# Supplementary material for: Age- and Strain-Related Differences in Bone Microstructure and Body Composition During Development in Inbred Male Mouse Strains
Source: Springer Nature journal article supplement (doi:10.1007/s00223-019-00652-8), 2020-01-04
Supplement: MOESM1 [file 17628746]

**Supplementary Table 1.** Calculation of effect sizes (Cohen’s D) for age differences between 8 and 24 wks of age in male C57BL/6J, DBA/2JRj and C3H/J mice.

|  | **Cohen’s D** | | | | |
| --- | --- | --- | --- | --- | --- |
| **Strains** | **Femur: Ct.Th** | **Tibia: Ct.Th** | **Femur Tb.BV/TV** | **Tibia Tb.BV/TV** | **L4**  **Tb.BV/TV** |
| C57BL/6J | 3.92 | 4.56 | 0.32 | 3.06 | 2.56 |
| DBA/2JRj | 4.25 | 4.18 | 5.36 | 2.36 | 0.99 |
| C3H/J | 4.19 | 4.38 | 1.55 | 0.54 | 0.27 |

Cohen's D was determined by calculating the mean difference between your two groups, and then dividing the result by the pooled standard deviation. Cohen’s D; d=0.2 is considered a 'small' effect size, 0.5 represents a 'medium' effect size and ≥0.8 a 'large' effect size. Ct.Th: cortical thickness, Tb.BV/TV: trabecular bone volume/tissue volume, L4: forth vertebral body.

**Supplementary Table 2:** Calculation of effect sizes (Cohen’s D) for strain differences at 8, 16 and 24 wks of age

|  | **Cohen’s D** | | | | | |
| --- | --- | --- | --- | --- | --- | --- |
| **Strains** | **Age** | **Femur Ct.Th** | **Tibia**  **Ct.Th** | **Femur Tb.BV/TV** | **Tibia Tb.BV/TV** | **L4 Tb.BV/TV** |
| C57BL/6J vs. DBA/2JRj | **8 wks** | 3.82 | 4.62 | 0.07 | 0.95 | 1.39 |
| C57BL/6J vs. C3H/J | 2.06 | 1.87 | 1.04 | 0.60 | 0.88 |
| DBA/2JRj vs C3H/J | 2.81 | 1.85 | 0.68 | 1.89 | 1.56 |
| C57BL/6J vs. DBA/2JRj | **16 wks** | 7.04 | 5.59 | 0.36 | 0.78 | 2.71 |
| C57BL/6J vs. C3H/J | 10.90 | 5.49 | 0.67 | 1.35 | 2.84 |
| DBA/2JRj vs C3H/J | 1.18 | 1.61 | 2.33 | 0.65 | 0.71 |
| C57BL/6J vs. DBA/2JRj | **24wks** | 4.88 | 7.19 | 6.30 | 5.31 | 5.56 |
| C57BL/6J vs. C3H/J | 8.43 | 9.03 | 2.10 | 2.88 | 7.16 |
| DBA/2JRj vs. C3H/J | 1.55 | 3.55 | 4.88 | 0.16 | 0.47 |

Cohen's D was determined by calculating the mean difference between your two groups, and then dividing the result by the pooled standard deviation. Cohen’s D; d=0.2 is considered a 'small' effect size, 0.5 represents a 'medium' effect size and ≥0.8 a 'large' effect size. Ct.Th: cortical thickness, Tb.BV/TV: trabecular bone volume/tissue volume, L4: forth vertebral body.

**Supplementary Table 3.** Weight and body composition characteristics in 8-, 16- and 24-week-old C57BL/6J, DBA/2JRJ, and C3H/J mice.

|  | **C57BL/6J** | | | **DBA/2JRj** | | | **C3H/J** | | |
| --- | --- | --- | --- | --- | --- | --- | --- | --- | --- |
| **Age (weeks)** | **8** | **16** | **24** | **8** | **16** | **24** | **8** | **16** | **24** |
| **Weight (g)** | 22.66 ±  0.40**†,a,b** | 29.07 ±  0.73**†,a,c** | 33.68 ±  1.36**b,c** | 24.10 ±  0.49**a,b** | 28.20 ±  1.10**§,a,c** | 31.15 ±  0.89**b,c** | 24.40 ±  0.40**†,a,b** | 33.78 ±  1.35**†,§,a** | 33.93 ±  1.28**b** |
| **Muscle Sum (g)** | 0.501 ±  0.022**a,b** | 0.597 ± 0.015**a** | 0.625 ± 0.015**b** | 0.456 ± 0.015**§,b** | 0.542 ± 0.032 | 0.603 ± 0.056**b** | 0.533 ± 0.010**§** | 0.584 ± 0.023 | 0.538 ± 0.027 |
| *-TRIC* | 0.114 ±  0.005 | 0.129 ± 0.006 | 0.135 ± 0.009 | 0.105 ± 0.001**§,a** | 0.127 ± 0.004a | 0.117 ± 0.006 | 0.121 ± 0.004§ | 0.125 ± 0.004 | 0.135 ± 0.011 |
| *-QUAD* | 0.161 ±  0.011**a,b** | 0.201 ± 0.008**a** | 0.205 ± 0.009**b** | 0.1585 ± 0.004**§,a,b** | 0.1783 ± 0.003**a** | 0.249 ± 0.058**b** | 0.184 ± 0.005**§** | 0.185 ± 0.016 | 0.169 ± 0.010 |
| *-TA* | 0.054 ±  0.004***** | 0.046 ± 0.003 | 0.049 ± 0.004 | 0.040 ± 0.002***,a** | 0.051 ± 0.003**a,c** | 0.044 ± 0.001**c** | 0.044 ± 0.004 | 0.053 ± 0.004 | 0.049 ± 0.003 |
| *-EDL* | 0.017 ±  0.003***** | 0.016 ± 0.002 | 0.021 ± 0.002 | 0.007 ± 0.001***,§,a,b** | 0.016 ± 0.002**a** | 0.019 ± 0.001**b** | 0.015 ± 0.002 | 0.017 ± 0.001 | 0.018 ± 0.002 |
| *-GAS* | 0.150 ±  0.012**a,b** | 0.196 ± 0.012**a** | 0.203 ± 0.012*,†,**b** | 0.139 ± 0.015 | 0.162 ± 0.026 | 0.167 ± 0.007***** | 0.161 ± 0.010a | 0.196 ± 0.012a,c | 0.159 ± 0.009**†,c** |
| *-SOL* | 0.006 ±  0.001**b** | 0.009 ± 0.001 | 0.012 ± 0.001***,†,b** | 0.007 ± 0.0001 | 0.007 ± 0.001 | 0.007 ± 0.001***** | 0.006 ± 0.0004 | 0.008 ± 0.0004 | 0.007 ± 0.001**†** |
| **Fat Sum (g)** | 2.246 ±  0.055***,b** | 3.099 ± 0.123***,†** | 4.631 ± 0.770**b** | 3.865 ± 0.267***,§,b** | 4.140 ± 0.403***** | 5.258 ± 0.306**b** | 2.306 ± 0.134**§,a,b** | 4.302 ± 0.292**†,a** | 3.946 ± 0.239**b** |
| *-Retroperitoneal* | 0.058 ±  0.006***,†,a,b** | 0.261 ± 0.027**a** | 0.536 ± 0.179**b** | 0.217 ± 0.013***,§,b** | 0.237 ± 0.047**c** | 0.451 ± 0.038**b,c** | 0.122 ± 0.018 **†,§,a,b** | 0.360 ± 0.038**a** | 0.348 ± 0.021**b** |
| *-Epididymal* | 0.346 ±  0.024 ***,b** | 0.708 ± 0.085**†** | 1.001 ± 0.181**b** | 0.527 ± 0.059***,§,a,b** | 0.943 ± 0.149**a** | 1.224 ± 0.066**b** | 0.384 ± 0.027§,a,b | 1.162 ± 0.111**†,a** | 1.075 ± 0.097**b** |
| *-Inguinal* | 0.148 ±  0.009 ***,†,b** | 0.164 ± 0.010 ***,†,c** | 0.544 ± 0.106 **b,c** | 0.446 ± 0.036 ***,§,b** | 0.385 ± 0.080 ***,§,c** | 0.694 ± 0.073 **b,c** | 0.259 ± 0.033**†,§,a,b** | 0.601 ± 0.066**†,§,a** | 0.6783 ± 0.052**b** |
| *-Mesenteric* | 0.383 ±  0.008***,b** | 0.572 ± 0.027 | 0.879 ± 0.154**b** | 0.646 ± 0.058*,**§,b** | 0.734 ± 0.074 | 0.903 ± 0.061**b** | 0.376 ± 0.020**§,a,b** | 0.742 ± 0.0060**a** | 0.633 ± 0.061**b** |

Data are presented as mean±SD. Muscle sum was calculated as the sum of the mass of 6 individual muscles namely M. triceps brachii (TRIC), M. quadriceps femoris (QUAD), M. tibialis anterior (TA), M. extensor digitorum longus (EDL), M. gastrocnemius (GAS) and M. soleus (SOL) dissected from the left arm and leg of the animals. Fat sum was calculated as the sum of the mass of 4 fat depots (retroperitoneal, epididymal, inguinal and mesenteric). Significant strain differences at a given time point are indicated with symbols: *****, indicates a difference between C57BL/6J and DBA/2JRj mice at the same time point; †, indicates a difference between C57BL/6J and C3H/J mice at the same time point; §, indicates a difference between DBA/2JRj and C3H/J mice at the same time point. Significant age differences within each strain are indicated with letters: **a**, indicates a difference between 8 and 16 wks of age within the same strain; **b**, indicates a difference between 8 and 24 wks of age within the same strain; **c**, indicates a difference between 16 and 24 wks of age within the same strain.

**Supplementary Table 4.** Cortical bone parameters in 8-, 16- and 24-week-old male C57BL/6J, DBA/2JRj, and C3H/J mice.

|  | **C57BL/6J** | | | **DBA/2JRj** | | | **C3H/J** | | |
| --- | --- | --- | --- | --- | --- | --- | --- | --- | --- |
| **Age (weeks)** | **8** | **16** | **24** | **8** | **16** | **24** | **8** | **16** | **24** |
| **Femur** | | | | | | | | | |
| Ct.Th (μm) | 0.16 ± 0.008*,†,a,b | 0.186 ± 0.008*,†,a | 0.2 ± 0.012*,†,b | 0.205 ± 0.014*,§,a,b | 0.264 ± 0.013*,§,a | 0.272 ± 0.017*,§,b | 0.244 ± 0.013†,§,a,b | 0.279 ± 0.009†,§,a | 0.294 ± 0.01†,§,b |
| Ct.TMD (mg HA/cm3) | 920 ± 47*,†,a,b | 1001 ± 44*,†,a | 1010 ± 10*,†,b | 982 ± 26*,a,b | 1078 ± 9*,a,c | 1117 ± 24*,b,c | 1001 ± 53†,a,b | 1059 ± 17†,a | 1087 ± 22†,b |
| Tt.Ar (mm2) | 1.09 ± 0.07†,a,b | 1.4 ± 0.09†,a,c | 1.58 ± 0.1†,b,c | 1.01 ± 0.05§,a,b | 1.31 ± 0.1§,a | 1.31 ± 0.1§,b | 1.44 ± 0.12†,§,a,b | 2.19 ± 0.22†,§,a | 2.26 ± 0.31†,§,b |
| Ct.Ar (mm2) | 0.95 ± 0.07†,a,b | 1.28 ± 0.11†,a,c | 1.44 ± 0.09*,†,b,c | 0.91 ± 0.06§,a,b | 1.22 ± 0.09§,a | 1.22 ± 0.09*,§,b | 1.33 ± 0.12†,§,a,b | 2.03 ± 0.21†,§,a | 1.94 ± 0.09†,§,b |
| Tt.Ar/Ct.Ar (%) | 87.4 ± 2.2*,†,a,b | 91 ±  1.7 a | 91 ±  0.5*,b | 90.2 ± 1.6*,a,b | 92.9 ±  1.3 a | 93.3 ± 1.1*,§,b | 92.3 ±  1.8† | 92.8 ±  0.7 c | 87.1 ± 8.7§,c |
| **Tibia** | | | | | | | | | |
| Ct.Th (μm) | 0.174 ± 0.012*,†,a,b | 0.205 ± 0.01*,†,a | 0.215 ± 0.005*,†,b | 0.223 ± 0.009*,§,a,b | 0.259 ± 0.009*,§,a | 0.257 ± 0.007*,§,b | 0.242 ± 0.011†,§,a,b | 0.28 ± 0.016†,§,a | 0.289 ± 0.011†,§,b |
| Ct.TMD (mg HA/cm3) | 900 ± 18*,†,a,b | 949 ± 23*,†,a | 968 ± 19*,†,b | 957 ± 19*,a,b | 1036 ± 34*,a | 1045 ± 13*,b | 945 ± 32†,a,b | 1003 ± 19†,a,c | 1054 ± 12†,b,c |
| Tt. Ar (mm2) | 0.94 ± 0.08*,†,b | 1.22 ± 0.11*,†,c | 1.58 ± 0.31*,b,c | 0.82 ± 0.06*,§,a,b | 0.98 ± 0.08*,§,a | 0.95 ± 0.05*,§,b | 1.13 ± 0.08†,§,a,b | 1.43 ± 0.15†,§,a | 1.51 ± 0.16§,b |
| Ct.Ar (mm2) | 0.81 ± 0.08†,a,b | 1.1 ± 0.11*,†,a,c | 1.31 ± 0.09*,b,c | 0.74 ± 0.05§,a,b | 0.91 ± 0.08*,§,a | 0.88 ± 0.04*,§,b | 1.03 ± 0.08†,§,a,b | 1.32 ± 0.13†,§,a | 1.34 ± 0.12§,b |
| Tt.Ar/Ct.Ar (%) | 86.4 ± 0.9*,†,a | 90.3 ± 0.8*,†,a | 85.1 ± 15*,† | 89.4 ± 0.7*,a,b | 92.7 ± 1.1*,a | 92.4 ± 0.6*,b | 90.8 ±  1.5† | 92.4 ± 0.6† | 89.5 ± 9.7† |

Data are presented as mean±SD. Cortical microstructure was determined at the midshaft of the femur and the tibia. Ct.Th: average cortical thickness, TMD: tissue mineral density, Ct.Ar: cortical bone area, Ct.TMD: tissue mineral density, Tt.Ar: total cross-sectional area, Ct.Ar/Tt.Ar: cortical bone area fraction. Significant strain differences at a given time point are indicated with symbols: *****, indicates a difference between C57BL/6J and DBA/2JRj mice at the same time point; †, indicates a difference between C57BL/6J and C3H/J mice at the same time point; §, indicates a difference between DBA/2JRj and C3H/J mice at the same time point. Significant age differences within each strain are indicated with letters: **a**, indicates a difference between 8 and 16 wks of age within the same strain; **b**, indicates a difference between 8 and 24 wks of age within the same strain; **c**, indicates a difference between 16 and 24 wks of age within the same strain.

|  | **C57BL/6J** | | | **DBA/2JRj** | | | **C3H/J** | | |
| --- | --- | --- | --- | --- | --- | --- | --- | --- | --- |
| **Age (weeks)** | **8** | **16** | **24** | **8** | **16** | **24** | **8** | **16** | **24** |
| **Femur** | | | | | | | | | |
| Tb.BV/TV (%) | 16.95 ± 5.85 | 14.89 ± 2.93 | 18.37 ± 2.16*,† | 16.56 ± 2.1 a,b | 12.04 ± 1.73§,a,c | 7.32 ± 1.23*,§,b,c | 18.49 ± 8.65 b | 16.62 ± 2.18§ | 14.36 ± 1.62†,§,b |
| Tb.N (1/mm) | 5.26 ± 0.98 | 4.43 ± 0.34*,† | 4.57 ± 0.39*,† | 5.71 ± 0.7§,a,b | 3.76 ± 0.27*,a,c | 2.48 ± 0.36*,§,b,c | 4.34 ± 0.42§,a,b | 3.75 ± 0.3†,a,c | 3.31 ± 0.3†,§,b,c |
| Tb.Th (mm) | 0.031 ± 0.006†,b | 0.033 ± 0.004†,c | 0.04 ± 0.003*,b,c | 0.029 ± 0.0015§ | 0.032 ± 0.002§ | 0.029 ± 0.002*,§ | 0.0424 ± 0.0047†,§ | 0.044 ± 0.004†,§ | 0.043 ± 0.002§ |
| Tb.Sp (mm) | 0.165 ± 0.044 | 0.193 ± 0.022* | 0.18 ± 0.02*,† | 0.148 ± 0.02 a,b | 0.236 ± 0.021*,a,c | 0.381 ± 0.061*,§,b,c | 0.19 ± 0.025 b | 0.224 ± 0.022 | 0.261 ± 0.031†,§,b |
| Conn.D (1/mm3) | 382 ± 95†,a,b | 216 ± 20†,a,c | 182 ± 33*,†,b,c | 439 ± 164§,a,b | 185 ± 24§,a,c | 97 ±  20*,b,c | 188 ± 50†,§,a,b | 119 ± 13†,§,a | 85 ± 14†,§,b |
| SMI | 1.91 ± 0.54 | 1.83 ± 0.29† | 1.44 ± 0.25*,† | 1.81 ± 0.12 a,b | 2.33 ± 0.13*,§,a,c | 2.58 ± 0.12*,§,b,c | 1.86 ± 0.3 | 1.74 ± 0.35§ | 1.82 ± 0.13†,§ |
| Tb.TMD (mg HA/cm3) | 789 ± 15*,†,a,b | 822 ± 15*,†,a | 827 ± 6*,†,b | 823 ± 11*,§,b | 841 ± 10*,§ | 845 ± 15*,§,b | 851 ± 19†,§,a,b | 878 ± 7†,§,a | 874 ± 9†,§,b |
| **Tibia** | | | | | | | | | |
| Tb.BV/TV (%) | 8.13 + 3.16 a,b | 13.84 + 3.23 a | 16.34 + 2.1*,†,b | 10.42 + 1.26§ | 11.58 + 2.57 c | 7.96 + 0.75*,c | 6.77 + 6.56§ | 9.9 + 2.56 | 8.34 + 3.32† |
| Tb.N (1/mm) | 3.4 + 1.07† | 4.36 + 0.68† | 4.21 + 0.44*,† | 3.97 + 0.53§,b | 3.76 + 0.55§,c | 2.53 + 0.19*,§,b,c | 2.08 + 0.56†,§ | 2.59 + 0.53†,§ | 2 + 0.76† |
| Tb.Th (mm) | 0.024 + 0.003†,a,b | 0.032 + 0.003†,a,c | 0.039 + 0.003*,b,c | 0.026 + 0.003§,a,b | 0.031 + 0.002§,a | 0.031 + 0.001*,§,b | 0.032 + 0.004†,§,a,b | 0.038 + 0.003†,§,a | 0.041 + 0.002§,b |
| Tb.Sp (mm) | 0.319 + 0.19† | 0.202 + 0.036† | 0.201 + 0.025*,† | 0.229 + 0.03§,b | 0.241 + 0.042§,c | 0.365 + 0.029*,b,c | 0.487 + 0.181†,§ | 0.364 + 0.093†,§ | 0.592 + 0.446† |
| Conn.D (1/mm3) | 166 +  80† | 191 + 49† | 140 + 27*,† | 182 + 83§,a,b | 181 + 39§,a | 103 + 22*,§,b | 63 +  25§ | 69 + 24†,§ | 44 +  12†,§ |
| SMI | 2.67 + 0.37 a,b | 1.98 + 0.31 a | 1.75 + 0.16*,†,b | 2.76 + 0.44 | 2.37 + 0.22 | 2.35 + 0.13* | 2.74 + 0.32 a | 2.27 + 0.27 a | 2.33 + 0.29† |
| Tb.TMD (mg HA/cm3) | 775 + 31†,a,b | 812 + 19†,a | 834 + 37†,b | 797 + 21 | 837 + 33 | 839 + 41† | 824 + 20†,b | 865 + 10†,§ | 902 + 45†,§,b |
| **L4** | | | | | | | | | |
| Tb.BV/TV (%) | 23.54 ± 2.87*,†,b | 27.04 ± 2.81*,† | 29.85 ± 1.97*,†,b | 19.98 ± 2.24* | 21.12 ± 1.27*,c | 17.68 ± 2.38*,c | 17.12 ± 20.34†,a | 19.83 ± 2.24†,a,c | 16.71 ± 1.68†,c |
| Tb.N (1/mm) | 6.62 ± 0.23*,†,a | 6.29 ± 0.15*,†,a | 6.31 ± 0.23*,† | 6.05 ± 0.41*,§,b | 5.54 ± 0.26*,§,c | 4.68 ± 0.42*,§,b,c | 4.27 ± 0.32†,§ | 4.6 ± 0.31†,§,c | 3.95 ± 0.34†,§,c |
| Tb.Th (mm) | 0.035 ± 0.003†,a,b | 0.043 ± 0.004*,a | 0.047 ± 0.003*,†,b | 0.033 ± 0.002§,a,b | 0.038 ± 0.001*,§,a | 0.038 ± 0.002*,§,b | 0.04 ± 0.003†,§ | 0.043 ± 0.002§ | 0.042 ± 0.001†,§ |
| Tb.Sp (mm) | 0.116 ± 0.008† | 0.116 ± 0.007*,† | 0.111 ± 0.006*,† | 0.133 ± 0.014§,b | 0.143 ± 0.009*,§,c | 0.177 ± 0.02*,§,b,c | 0.195 ± 0.017†,§ | 0.175 ± 0.017†,§,c | 0.213 ± 0.023†,§,c |
| Conn.D (1/mm3) | 460 ± 53†,a,b | 279 ± 23†,a | 234 ± 23†,b | 498 ± 42§,a,b | 299 ± 18§,a,c | 202 ± 25§,b,c | 202 ± 36†,§,b | 184 ± 8†,§,c | 137 ± 16†,§,b,c |
| SMI | 0.81 ± 0.21†,a,b | 0.24 ± 0.22*,†,a | 0.14 ± 0.09*,†,b | 1.03 ± 0.24 | 0.9 ± 0.12* | 1 ± 0.2* | 1.27 ± 0.1†,a | 0.97 ± 0.16†,a,c | 1.26 ± 0.21†,c |
| Tb.TMD (mg HA/cm3) | 852 ±  17 b | 873 ± 14†,c | 912 ± 6*,†,b,c | 842 ± 16§,a,b | 881 ± 14§,a | 884 ± 11*,§,b | 875 ± 19§,a,b | 901 ± 11†,§,a,c | 928 ± 9†,§,b,c |

**Supplementary Table 5.** Trabecular bone parameters in 8-, 16- and 24-week-old C57BL/6J, DBA/2JRj, and C3H/J mice.

Data are presented as mean±SD. Trabecular bone microstructure was assessed at the distal femur, proximal tibia and forth vertebral body (L4). Tb.BV/TV: trabecular bone volume/tissue volume, Tb.N: trabecular number, Tb.Th: trabecular thickness, Tb.Sp: trabecular separation. Conn.D: connectivity density, SMI: structure model index, Tb.TMD: trabecular mineral density. Significant strain differences at a given timepoint are indicated with symbols: *****, indicates a difference between C57BL/6J and DBA/2JRJ mice at the same time point; †, indicates a difference between C57BL/6J and C3H/J mice at the same time point; §, indicates a difference between DBA/2JRj and C3H/J mice at the same time point. Significant age differences within each strain are indicated with letters: **a**, indicates a difference between 8 and 16 wks of age within the same strain; **b**, indicates a difference between 8 and 24 wks of age within the same strain; **c**, indicates a difference between 16 and 24 wks of age within the same strain.

**Supplementary Table 6.** Body composition characteristics expressed relative to body weight in 8-, 16- and 24-week-old C57BL/6J, DBA/2JRj, and C3H/J mice.

|  | **C57BL/6J** | | | **DBA/2JRj** | | | **C3H/J** | | |
| --- | --- | --- | --- | --- | --- | --- | --- | --- | --- |
| **Age (weeks)** | **8** | **16** | **24** | **8** | **16** | **24** | **8** | **16** | **24** |
| **Muscle Sum (% body weight)** | 2.213 ± 0.225*,b | 2.057 ± 0.112 | 1.869 ± 0.198b | 1.897 ± 0.178*,§ | 1.939 ± 0.352 | 1.936 ± 0.391 | 2.189 ± 0.176§,a,b | 1.734 ± 0.16a | 1.588 ± 0.169b |
| *-TRIC* | 0.503 ± 0.046 | 0.446 ± 0.058 | 0.406 ± 0.086 | 0.438 ± 0.031 | 0.454 ± 0.051§,c | 0.378 ± 0.05c | 0.498 ± 0.054a,b | 0.372 ± 0.041§a | 0.397 ± 0.064b |
| *-QUAD* | 0.709 ± 0.119 | 0.693 ± 0.09 | 0.612 ± 0.086 | 0.658 ± 0.02 | 0.637 ± 0.069 | 0.792 ± 0.408§ | 0.756 ± 0.052a,b | 0.544 ± 0.075a | 0.5 ± 0.061§,b |
| *-TA* | 0.24 ± 0.041*,†,a,b | 0.159 ± 0.03a | 0.147 ± 0.033b | 0.164 ± 0.018* | 0.182 ± 0.031c | 0.143 ± 0.013c | 0.182 ± 0.039† | 0.156 ± 0.022 | 0.145 ± 0.02 |
| *-EDL* | 0.075 ± 0.036* | 0.055 ± 0.017 | 0.062 ± 0.013 | 0.029 ± 0.007*,a,b | 0.057 ± 0.017a | 0.06 ± 0.011b | 0.063 ± 0.021 | 0.05 ± 0.01 | 0.052 ± 0.017 |
| *-GAS* | 0.66 ± 0.128 | 0.672 ± 0.067 | 0.606 ± 0.099† | 0.58 ± 0.166 | 0.581 ± 0.243 | 0.539 ± 0.081 | 0.665 ± 0.124b | 0.588 ± 0.12 | 0.472 ± 0.069†,b |
| *-SOL* | 0.026 ± 0.01 | 0.025 ± 0.012 | 0.036 ± 0.009*,† | 0.029 ± 0.004 | 0.027 ± 0.007 | 0.024 ± 0.007* | 0.026 ± 0.004 | 0.024 ± 0.003 | 0.021 ± 0.007† |
| **Fat Sum (% body weight)** | 9.943 ± 0.913* | 10.662 ± 0.877* | 13.474 ± 4.352 | 16.019 ± 18*,§ | 14.533 ± 2.198* | 16.887 ± 2.172§ | 9.439 ± 1.209§,a,b | 12.694 ± 1.118a | 11.595 ± 0.853§,b |
| *-Retroperitoneal* | 0.258 ± 0.066*,†,b | 0.89 ± 0.159 | 1.534 ± 1.181b | 0.902 ± 0.13*,§,b | 0.818 ± 0.345c | 1.445 ± 0.254b,c | 0.5 ± 0.172†,§a,b | 1.06 ± 0.208a | 1.013 ± 0.127b |
| *-Epididymal* | 1.528 ± 0.243*,b | 2.427 ± 0.652 | 2.903 ± 1.02b | 2.179 ± 0.561*,§,a,b | 3.269 ± 0.964a | 3.92 ± 0.332b | 1.568 ± 0.246§,a,b | 3.414 ± 0.495a | 3.141 ± 0.488b |
| *-Inguinal* | 0.654 ± 0.102*,†,b | 0.569 ± 0.108*,†,c | 1.574 ± 0.594b,c | 1.843 ± 0.284*,§ | 1.34 ± 0.56*,c | 2.232 ± 0.588c | 1.06 ± 0.318†,§,a,b | 1.762 ± 0.312†,a | 1.994 ± 0.286b |
| *-Mesenteric* | 1.694 ± 0.129*,b | 1.965 ± 0.181* | 2.55 ± 0.857b | 2.675 ± 0.519*,§ | 2.575 ± 0.422* | 2.889 ± 0.364§ | 1.54 ± 0.174§,a | 2.179 ± 0.252a | 1.849 ± 0.279§ |

Data are presented as mean±SD. Muscle sum was calculated as the sum of the mass of 6 individual muscles namely M. triceps brachii (TRIC), M. quadriceps femoris (QUAD), M. tibialis anterior (TA), M. extensor digitorum longus (EDL), M. gastrocnemius (GAS) and M. soleus (SOL) dissected from the left arm and leg of the animals. Fat sum was calculated as the sum of the mass of 4 fat depots (retroperitoneal, epididymal, inguinal and mesenteric). Significant strain differences at a given timepoint are indicated with symbols: *****, indicates a difference between C57BL/6J and DBA/2JRj mice at the same time point; †, indicates a difference between C57BL/6J and C3H/J mice at the same time point; §, indicates a difference between DBA/2JRj and C3H/J mice at the same time point. Significant age differences within each strain are indicated with letters: **a**, indicates a difference between 8 and 16 wks of age within the same strain; **b**, indicates a difference between 8 and 24 wks of age within the same strain; **c**, indicates a difference between 16 and 24 wks of age within the same strain.

**Supplementary Table 7** Correlation analysis between main bone parameter, weight and body composition by strain (data pooled for age).

|  |  | **C57BL/6J** | | | **DBA/2JRj** | | | **C3H/J** | | |
| --- | --- | --- | --- | --- | --- | --- | --- | --- | --- | --- |
| **Age (weeks)** |  | **Weight** | **Muscle Sum** | **Fat Sum** | **Weight** | **Muscle Sum** | **Fat Sum** | **Weight** | **Muscle Sum** | **Fat Sum** |
| **Tibia** | | | | | | | | | | |
| Ct.Th (μm) | r or rho | **0.743** | **0.792** | **0.730** | **0.668** | **0.631** | 0.324 | **0.822** | 0.308 | **0.776** |
|  | P-value | **<0.001** | **<0.0001** | **0.001** | **0.002** | **0.005** | 0.189 | **<0.001** | 0.214 | **<0.001** |
| Ct.TMD (mg HA/cm3) | r or rho | **0.762** | **0.804** | **0.734** | **0.624** | **0.628** | 0.354 | **0.736** | 0.023 | **0.649** |
|  | P-value | **<0.001** | **<0.001** | **0.001** | **0.006** | **0.005** | 0.149 | **<0.001** | 0.928 | **0.004** |
| Tb.BV/TV (%) | r or rho | **0.705** | **0.732** | **0.717** | **-0.494** | **-0.410** | **-0.618** | **0.509** | 0.200 | **0.549** |
|  | P-value | **0.001** | **0.001** | **0.001** | **0.037** | **0.091** | **0.006** | **0.031** | 0.425 | **0.018** |
| Tb.N (1/mm) | r or rho | 0.329 | **0.496** | **0.523** | **-0.728** | **-0.449** | **-0.652** | 0.286 | 0.118 | 0.386 |
|  | P-value | 0.182 | **0.036** | **0.026** | **0.001** | **0.062** | **0.003** | 0.249 | 0.641 | 0.113 |
| Tb.Th (μm) | r or rho | **0.838** | **0.755** | **0.725** | **0.491** | 0.346 | 0.133 | **0.753** | 0.212 | **0.642** |
|  | P-value | **<0.001** | **<0.001** | **0.001** | **0.039** | 0.160 | 0.600 | **<0.001** | 0.399 | **0.004** |
| Tb.Sp (mm) | r or rho | -0.430 | **-0.562** | **-0.639** | **0.714** | 0.428 | **0.668** | -0.038 | -0.090 | -0.164 |
|  | P-value | 0.075 | **0.015** | **0.004** | **0.001** | 0.076 | **0.002** | 0.880 | 0.722 | 0.516 |
| **L4** | | | | | | | | | | |
| Tb.BV/TV (%) | r or rho | **0.678** | **0.678** | **0.520** | -0.253 | -0.226 | -0.426 | 0.449 | **0.664** | 0.391 |
|  | P-value | **0.002** | **0.002** | **0.027** | 0.312 | 0.367 | 0.078 | 0.062 | **0.003** | 0.108 |
| Tb.N (1/mm) | r or rho | **-0.505** | -0.391 | **-0.583** | **-0.652** | **-0.579** | **-0.585** | 0.169 | **0.486** | 0.221 |
|  | P-value | **0.033** | 0.108 | **0.011** | **0.003** | **0.012** | **0.011** | 0.504 | **0.041** | 0.378 |
| Tb.Th (μm) | r or rho | **0.792** | **0.750** | **0.692** | **0.639** | **0.492** | 0.270 | **0.648** | **0.631** | **0.598** |
|  | P-value | **<0.001** | **<0.001** | **0.001** | **0.004** | **0.038** | 0.279 | **0.004** | **0.005** | **0.009** |
| Tb.Sp (mm) | r or rho | -0.223 | -0.286 | -0.116 | **0.578** | **0.515** | **0.570** | -0.182 | **-0.513** | -0.224 |
|  | P-value | 0.374 | 0.249 | 0.647 | **0.012** | **0.029** | **0.014** | 0.469 | **0.029** | 0.371 |

Correlation analysis was performed using Pearson's correlation coefficient r or Spearman’s rho for parametric and non-parametric data, respectively. Significant correlations (P<0.05) are indicated in bold. Ct.Th: average cortical thickness, Ct.TMD: tissue mineral density, Tb.BV/TV: trabecular bone volume/tissue volume, Tb.N: trabecular number, Tb.Th: trabecular thickness, Tb.Sp: trabecular separation, L4: Forth vertebral body.
